# Supplementary material for: Hidden piezoelectric performances of BiFeO3-based textured ceramics
Source: Royal Society of Chemistry journal article supplement (doi:10.1039/d2qi00862a), 2022-01-01
Supplement: d2qi00862a1.pdf [file d2qi00862a1.pdf]

## **Electronic Supplementary Information**

### **Hidden piezoelectric performances of BiFeO<sub>3</sub>-based textured ceramics**

Yunjing Shi<sup>a</sup>, Xiaoyu Dong<sup>b</sup>, Bo Shen<sup>a</sup> and Jiwei Zhai<sup>a\*</sup>

<sup>a</sup>Key Laboratory of Advanced Civil Engineering Materials of Ministry of Education, Functional Materials Research Laboratory, School of Materials Science & Engineering, Tongji University, 4800 Caoan Road, Shanghai 201804, China

<sup>b</sup>Key Laboratory of Functional Materials and Devices for Special Environments of CAS, Xinjiang Technical Institute of Physics & Chemistry of CAS, Xinjiang Key Laboratory of Electronic Information Materials and Devices, 40-1 South Beijing Road, Urumqi 830011, China

Prof. Jiwei Zhai

E-mail address: [apzhai@tongji.edu.cn](mailto:apzhai@tongji.edu.cn)

## CONTENTS

**Figure S1.** Photograph of the quenched ceramics with Au electrode.

**Figure S2.** XRD patterns and microstructure of the BT template.

**Figure S3.** XRD patterns of the ceramics.

**Figure S4.** Micro structures of the ceramics.

**Figure S5.** The  $d_{33}$  value of quenched random samples.

**Figure S6.** PE loops of quenched random samples.

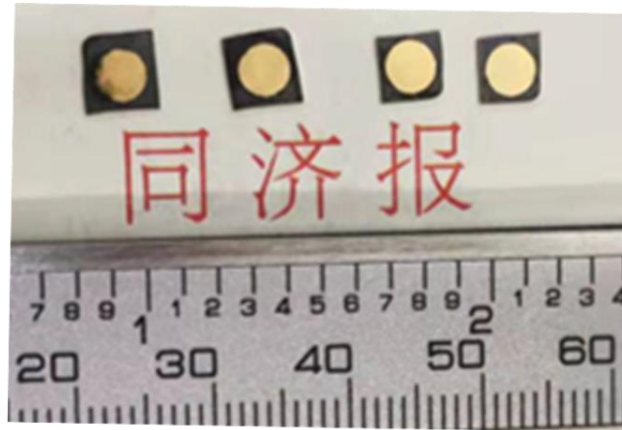

**Figure S1.** Photograph of the quenched ceramics with Au electrode

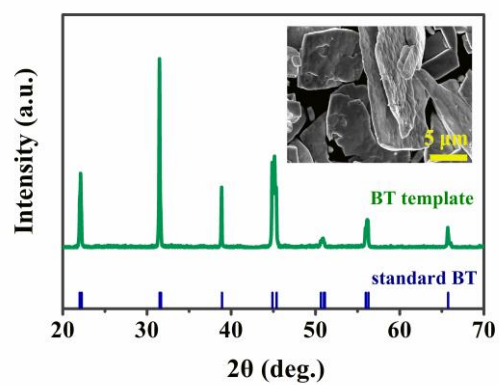

**Figure S2.** XRD patterns and microstructure of the BT template

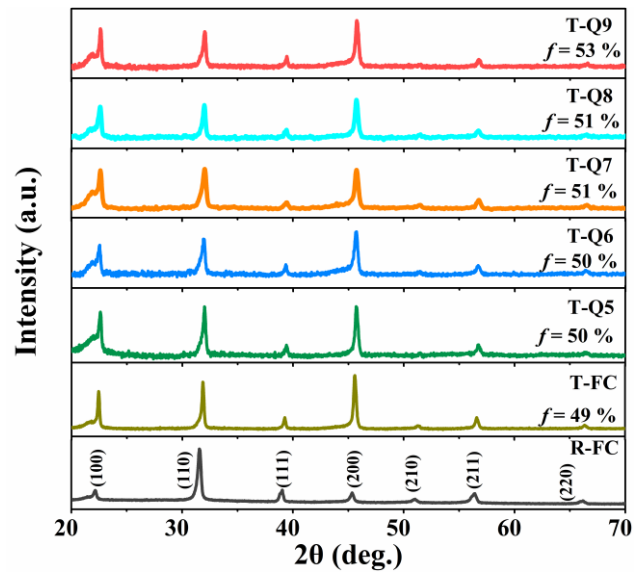

**Figure S3.** XRD patterns of the ceramics

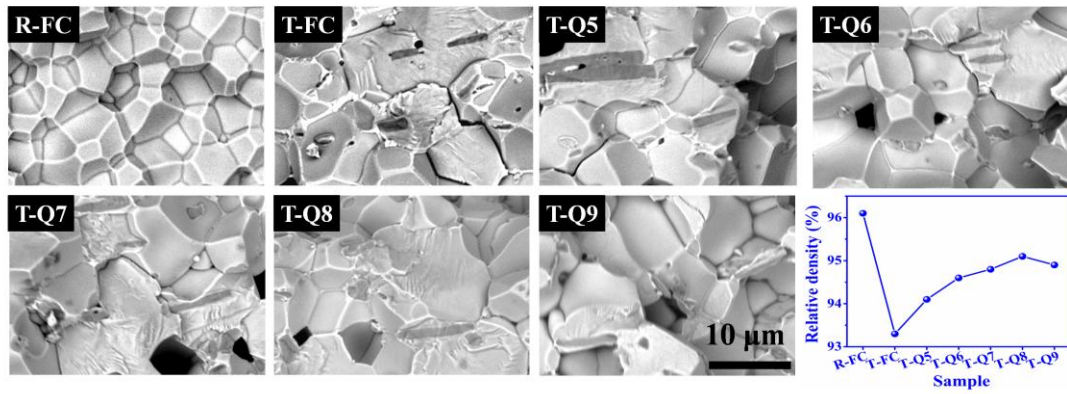

**Figure S4.** Micro structures of the ceramics

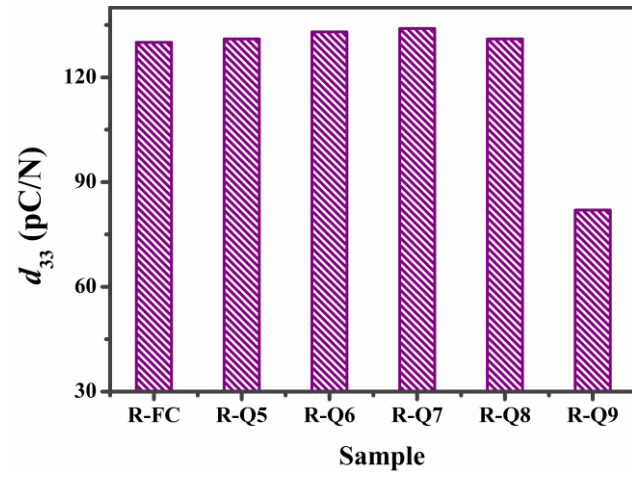

**Figure S5.** The  $d_{33}$  value of quenched random samples

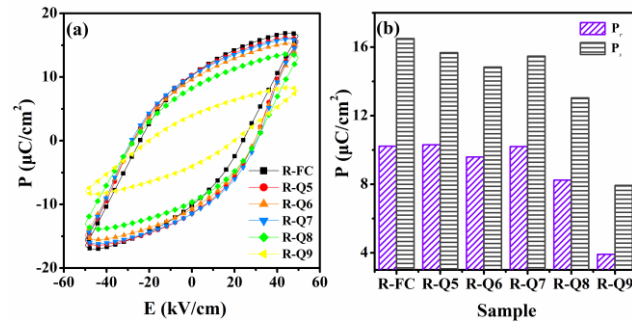

**Figure S6.** PE loops of quenched random samples
